# Supplementary material
Source: PubMed Central journal article supplement (PMC8096675)
Supplement: NIHMS1666829-supplement-1.pdf [file NIHMS1666829-supplement-1.pdf]

## **Supplemental Material**

Figure S1. Analytic timeline

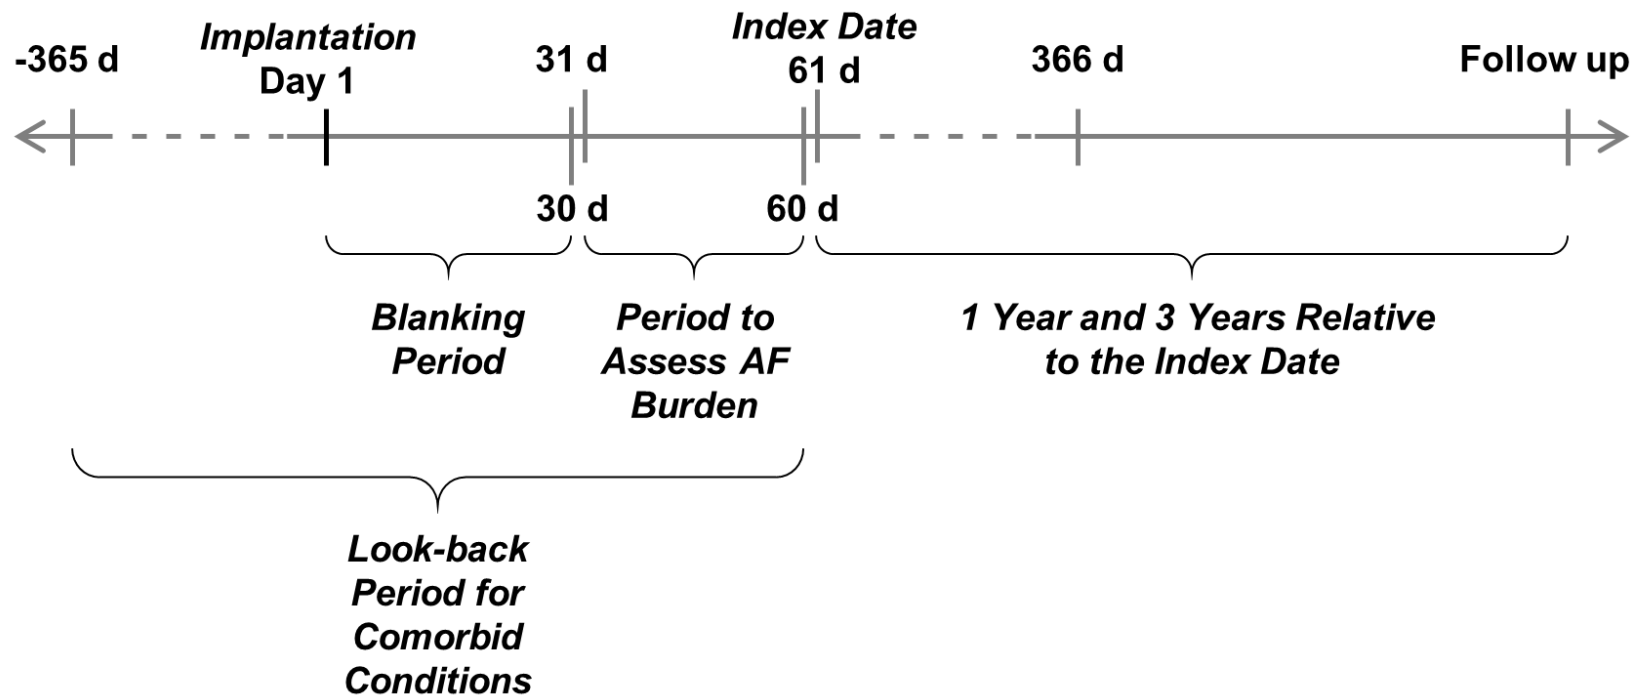

## Table S1: ICD Database Linkage Methods

1. Subset Medicare data using broadly defined inclusion criteria to match registry entry criteria. For this project, these criteria would include any inpatient or outpatient claim having an associated procedure code indicating an implanted cardiac device (e.g., pacemaker, cardiac resynchronization therapy, implantable cardioverter defibrillator, etc.)
2. Link Medicare hospital identifiers to registry hospital identifiers by examining the number of records linked using exact criteria:
  - a. CMS procedure date = Registry procedure date (in both cases, this is the implant date)
  - b. CMS patient date of birth = Registry patient date of birth
  - c. CMS patient sex = Registry patient sex

Hospital identifiers do not have to be 1:1 between data sources. We often find that registry sites represent multiple hospitals. We use the results of this step to inform the patient-specific record linkage in Step 3.

3. Link Medicare claims to registry records within hospitals using any of the following rules:
  - a. Rule 1: Exact  
CMS hospital identifier = Registry hospital identifier (from Step 2, required) AND  
CMS procedure date = Registry procedure date AND  
CMS patient date of birth (DOB) = Registry patient date of birth AND  
CMS patient sex = Registry patient sex
  - b. Rule 2: Exact, except sex  
CMS hospital identifier = Registry hospital identifier (from Step 2, required) AND  
CMS procedure date = Registry procedure date AND  
CMS patient DOB = Registry patient DOB AND  
CMS patient sex = Registry patient sex
  - c. Rule 3: Exact, except DOB, which is still required to be "close"  
CMS hospital identifier = Registry hospital identifier (from Step 2, required) AND  
CMS procedure date = Registry procedure date AND  
2 of (day, month, year) from CMS patient DOB match w/ Registry patient DOB  
AND  
CMS patient sex = Registry patient sex
  - d. Rule 4: Exact, except procedure date, which is still required to be "close"  
CMS hospital identifier = Registry hospital identifier (from Step 2, required) AND  
CMS procedure date = Registry procedure date  $\pm$  1 day AND  
CMS patient DOB match = Registry patient DOB AND  
CMS patient sex = Registry patient sex

Almost all matches made using these rules will be within Rule 1 (>90%). Based on validation work at Duke,<sup>1</sup> we have confidence that patients identified using the other 3 rules are correct. These links reflect the imperfections of both registry and claims data.

**Table S2. AF burden distribution across all patients (n=39,710) across all follow-up period.**

| N of records | AF Percent<br>N=59692417 | AF Max Duration (minutes)<br>N=61237588 |
|--------------|--------------------------|-----------------------------------------|
| Mean(SD)     | 12.54 (31.15)            | 84.41(850.83)                           |
| Min          | 0                        | 0                                       |
| Max          | 100                      | 79184.27                                |
| 25%          | 0                        | 0                                       |
| 50%          | 0                        | 0                                       |
| 75%          | 0.07                     | 0                                       |
| 90%          | 94.70                    | 15.8                                    |
| 95%          | 100                      | 449.33                                  |
| Missing      | 2.52%                    | 0%                                      |

**Table S3: Co-variate definitions and administrative coding algorithms.**

| <b>Characteristic</b>       | <b>Definition</b>                                                                                                                                                                     |                                                                                                                                                                                                                                                            |
|-----------------------------|---------------------------------------------------------------------------------------------------------------------------------------------------------------------------------------|------------------------------------------------------------------------------------------------------------------------------------------------------------------------------------------------------------------------------------------------------------|
| Age, years [mean (std)]     | Age at index date (continuous)                                                                                                                                                        |                                                                                                                                                                                                                                                            |
| Sex, male                   | Male (0/1)                                                                                                                                                                            |                                                                                                                                                                                                                                                            |
| Race/ethnicity              | Categorical (white/black/other)                                                                                                                                                       |                                                                                                                                                                                                                                                            |
| White                       |                                                                                                                                                                                       |                                                                                                                                                                                                                                                            |
| Black                       |                                                                                                                                                                                       |                                                                                                                                                                                                                                                            |
| Other                       |                                                                                                                                                                                       |                                                                                                                                                                                                                                                            |
| Clinically diagnosed AF     | AF (0/1)<br>A diagnosis of AF (ICD-9-CM 427.31 or ICD-10-CM I48.0*-I48.2*, I48.91) in any position on an inpatient, outpatient or carrier claim in the 12 months prior to index date. |                                                                                                                                                                                                                                                            |
| Device voltage type         | Low-voltage (0/1)                                                                                                                                                                     |                                                                                                                                                                                                                                                            |
| Low-voltage device          | Ascertained from device database Categorical (PM, CRT-P)                                                                                                                              |                                                                                                                                                                                                                                                            |
| High-voltage device         | Ascertained from device database Categorical (ICD, CRT-D)                                                                                                                             |                                                                                                                                                                                                                                                            |
| Device type                 | Categorical: Pacemaker, CRT-P, ICD, CRT-D                                                                                                                                             |                                                                                                                                                                                                                                                            |
| <b>Comorbid conditions</b>  | Ascertained from Medicare inpatient, outpatient and carrier claims in the 365 days prior to index date (60 days post-implant).                                                        |                                                                                                                                                                                                                                                            |
|                             | <b>ICD-9-CM Codes</b>                                                                                                                                                                 | <b>ICD-10-CM Codes</b>                                                                                                                                                                                                                                     |
| Dementia                    | Quan: 290.* , 294.1* , 331.2                                                                                                                                                          | F01.* , F02.* , F03.9* , G31.1*                                                                                                                                                                                                                            |
| Diabetes Mellitus           | Birman-Deych: 250.*                                                                                                                                                                   | E10.*-E13.*                                                                                                                                                                                                                                                |
| Ischemic heart disease      | Birman-Deych: 410.*-414.* , 429.2, V45.81                                                                                                                                             | I20.*-I22.* , I24.* , I25.* , Z95.1*                                                                                                                                                                                                                       |
| Peripheral vascular disease | Quan: 093.0* , 437.3, 440.* , 441.* , 443.1, 443.2* , 443.8* , 443.9, 447.1* , 557.1* , 557.9* , V43.4*                                                                               | A52.01* , E08.51, E08.52, E09.51, E09.52, E10.51, E10.52, E11.51, E11.52, E13.51, E13.52, I67.0* , I67.1* , I70.* , I71.* , I73.1* , I73.8* , I73.9* , I77.7* , I79.* , K55.1* , K55.8* , K55.9* , Z958.2*                                                 |
| Congestive Heart Failure    | Birman-Deych: 398.91, 402.01, 402.11, 402.91, 404.01, 404.03, 404.11, 404.13, 404.91, 404.93, 428.*                                                                                   | I09.81, I11.0* , I13.0* , I13.2* , I50.*                                                                                                                                                                                                                   |
| Cerebrovascular disease     | Quan: 362.34, 430.*-438.*                                                                                                                                                             | G45.0, G45.1, G45.2, G45.4, G45.8, G45.9, G46.* , H34.0* , I60.*-I63.* , I65.*-I66.* , I67.1* , I67.2* , I67.4* , I67.5* , I67.6*-I67.7* , I67.81, I67.82, I67.84, I67.89, I67.9* , I68.*-I69.* , I10.*-I13.* , I15.0, I15.2, I15.8, I15.9, I16.* , I67.4* |
| Hypertension                | Birman-Deych: 401.*-405.* , 437.2                                                                                                                                                     | I27.2* , I27.81, I27.89, I27.9* , J40.*-J44.* , J45.2*-J45.5* , J45.90, J45.99, J47.* , J60.* , J61.*-J67, J68.4* , J70.1* , J70.2* , J70.3* , J70.4* , J70.8*                                                                                             |
| COPD                        | Quan: 416.8, 416.9, 490.* -505.* , 506.4* , 508.1* , 508.8*                                                                                                                           | I12.0, I13.11, I13.2* , N03.* , N05.2*-N05.5* , N05.9* , N06.2*-N06.5* , N07.2*-N07.5* , N08.* , N17.1* , N17.2* , N18.* , N19.* , N25.0* , Z48.22, Z49.0* , Z49.3* , Z94.0* , Z99.2, Z91.15                                                               |
| Renal disease               | Quan: 403.01, 403.11, 403.91, 404.02, 404.03, 404.12, 404.13, 404.92, 404.93, 582.* , 583.0*-583.7* , 585.* , 586.* , 588.0* , V42.0* , V45.1* , V56.*                                | G45.0, G45.1, G45.2, G45.8, G45.9, G46.0, G46.1, G46.2, I63.* ,                                                                                                                                                                                            |
| Stroke/TIA                  | Birman-Deych: 433.x1, 434.x1, 435.* , 436.* , 437.1, 437.9* , 438.*                                                                                                                   |                                                                                                                                                                                                                                                            |

| Characteristic                        | Definition                                                                                                                                                                                                                                                                                                                                                                                                                                                                                                                                    |                                                                                                                                                                                                                                                                                                                                                                                                                                                     |
|---------------------------------------|-----------------------------------------------------------------------------------------------------------------------------------------------------------------------------------------------------------------------------------------------------------------------------------------------------------------------------------------------------------------------------------------------------------------------------------------------------------------------------------------------------------------------------------------------|-----------------------------------------------------------------------------------------------------------------------------------------------------------------------------------------------------------------------------------------------------------------------------------------------------------------------------------------------------------------------------------------------------------------------------------------------------|
| Myocardial infarction                 | Quan: 410.* , 412.*                                                                                                                                                                                                                                                                                                                                                                                                                                                                                                                           | I67.81, I67.82, I67.84, I67.89, I67.9*, I69.*                                                                                                                                                                                                                                                                                                                                                                                                       |
| Cancer (metastatic or non-metastatic) | Quan Non-metastatic:<br>140.* , 141.* , 142.* , 143.* , 144.* , 145.* , 146.* , 147.* , 148.* , 149.* , 150.* , 151.* , 152.* , 153.* , 154.* , 155.* , 156.* , 157.* , 158.* , 159.* , 160.* , 161.* , 162.* , 163.* , 164.* , 165.* , 170.* , 171.* , 172.* , 174.* , 175.* , 176.* , 179* , 180.* , 181* , 182.* , 183.* , 184.* , 185* , 186.* , 187.* , 188.* , 189.* , 190.* , 191.* , 192.* , 193* , 194.* , 195.* , 200.* , 201.* , 202.* , 203.* , 204.* , 205.* , 206.* , 207.* , 208.* , 238.6*<br>Quan Metastatic:<br>196.*-199.* | I21.* , I22.* , I25.2*<br>Quan Non-metastatic<br>C00.*-C26.* , C30.*-C34.* , C37.*-C41.* , C43.* , C45.0*-C45.2* , C45.7* , C45.9 , C46.*-C58.* , C60.* , C61.* , C62.0* , C62.1* , C62.9* , C63.*-C76.* , C81.*-C86.* , C88.2*-C88.4* , C88.8* , C88.9* , C90.*-C93.* , C94.0* , C94.1* , C94.2* , C94.3* , C94.8* , C95.* , C96.0* , C96.2* , C96.4* , C96.9* , C96.A , C96.Z , D03.* , D45.* , D47.Z9<br>Quan Metastatic:<br>C45.9 , C77.*-C80.* |
| Valvular heart disease                | Birman-Deych: 394.*-397.* , 398.9* , V42.2* , V43.3* , 424.*                                                                                                                                                                                                                                                                                                                                                                                                                                                                                  | I05.*-I08.* , I09.1* , I09.81 , I09.89 , I09.9* , I34.*-I39.* , Z95.2* , Z95.3* , Z95.4*                                                                                                                                                                                                                                                                                                                                                            |
| CHADS2-VASC score, Mean (std)         | One point each for age 65 – 74, female, history of heart failure, hypertension, vascular disease (peripheral vascular disease or ischemic heart disease), and diabetes. 2 points each for age ≥75 and history of stroke/TIA.                                                                                                                                                                                                                                                                                                                  |                                                                                                                                                                                                                                                                                                                                                                                                                                                     |
| Score≤2                               |                                                                                                                                                                                                                                                                                                                                                                                                                                                                                                                                               |                                                                                                                                                                                                                                                                                                                                                                                                                                                     |
| Score=3                               |                                                                                                                                                                                                                                                                                                                                                                                                                                                                                                                                               |                                                                                                                                                                                                                                                                                                                                                                                                                                                     |
| Score≥4                               |                                                                                                                                                                                                                                                                                                                                                                                                                                                                                                                                               |                                                                                                                                                                                                                                                                                                                                                                                                                                                     |
| CHADS2 score, Mean (std)              | One point each for history of heart failure, hypertension, age ≥75, or diabetes and 2 points for stroke/TIA.                                                                                                                                                                                                                                                                                                                                                                                                                                  |                                                                                                                                                                                                                                                                                                                                                                                                                                                     |
| Score=0                               |                                                                                                                                                                                                                                                                                                                                                                                                                                                                                                                                               |                                                                                                                                                                                                                                                                                                                                                                                                                                                     |
| Score=1                               |                                                                                                                                                                                                                                                                                                                                                                                                                                                                                                                                               |                                                                                                                                                                                                                                                                                                                                                                                                                                                     |
| Score≥2                               |                                                                                                                                                                                                                                                                                                                                                                                                                                                                                                                                               |                                                                                                                                                                                                                                                                                                                                                                                                                                                     |

**Table S4. Baseline atrial fibrillation burden, stratified by baseline presence of heart failure**

**(HF).**

| Arrhythmia Burden Measure |            |                      | HF at Baseline         | No HF at Baseline         |
|---------------------------|------------|----------------------|------------------------|---------------------------|
| Percent in AF             |            |                      | 6.60 (19.32)           | 6.13 (17.56)              |
|                           |            | Mean (SD)            | 0 (0, 0.39, 98)        | 0 (0, 1.35, 98)           |
|                           |            | Median (25, 75, max) |                        |                           |
| Maximum Duration, min     |            |                      | 467.72 (3027.64)       | 291.08 (1484.58)          |
|                           |            | Mean (SD)            | 0 (0, 24.50, 43200.00) | 0.17(0, 165.07, 43200.00) |
|                           |            | Median (25, 75, max) |                        |                           |
| Percent in AF             | 0 (ref.)   | N (%)                | 13538 (54.04)          | 6952 (47.43)              |
|                           | (0, 5]     | N (%)                | 7750 (30.93)           | 5255 (35.86)              |
|                           | (5, 98)    | N (%)                | 3766 (15.03)           | 2449 (16.71)              |
| Maximum Duration, min     | 0 (ref.)   | N (%)                | 16827 (67.16)          | 8763 (59.79)              |
|                           | (1, 59]    | N (%)                | 2508 (10.01)           | 1472 (10.04)              |
|                           | (59, 1410) | N (%)                | 3302 (13.18)           | 3109 (21.21)              |
|                           | ≥1410      | N (%)                | 2417 (9.65)            | 1312 (8.95)               |

**Table S5. Baseline characteristics of study cohort, stratified by baseline AF burden.**

|                                             | Overall       | Percent in AF: 0 | Percent in AF: (0, 5] | Percent in AF: (5,98) | p-value |
|---------------------------------------------|---------------|------------------|-----------------------|-----------------------|---------|
| N                                           | 39,710        | 20,490           | 13,005                | 6,215                 |         |
| <b>Demographics</b>                         |               |                  |                       |                       |         |
| Age, years [mean (std)]                     | 77.1 (8.7)    | 77.0 (8.7)       | 77.3 (8.8)            | 77.4 (8.2)            | .001    |
| Male                                        | 24,119 (60.7) | 12,787 (62.4)    | 7,656 (58.9)          | 3,676 (59.1)          | < .001  |
| <b>Race/ethnicity</b>                       |               |                  |                       |                       |         |
| White                                       | 36,710 (92.4) | 18,935 (92.4)    | 11,992 (92.2)         | 5,783 (93.0)          | .12     |
| Black                                       | 1,997 (5.0)   | 1,057 (5.2)      | 677 (5.2)             | 263 (4.2)             | .007    |
| Other                                       | 319 (0.8)     | 156 (0.8)        | 105 (0.8)             | 58 (0.9)              | .41     |
| <b>Device Voltage</b>                       |               |                  |                       |                       |         |
| Low Voltage Device                          | 20,156 (50.8) | 9,548 (46.6)     | 6,785 (52.2)          | 3,823 (61.5)          | < .001  |
| High Voltage Device                         | 19,554 (49.2) | 10,942 (53.4)    | 6,220 (47.8)          | 2,392 (38.5)          | < .001  |
| <b>Device Type</b>                          |               |                  |                       |                       |         |
| Dual Chamber ICD                            | 7,750 (19.5)  | 4,290 (20.9)     | 2,638 (20.3)          | 822 (13.2)            | < .001  |
| Cardiac Resynchronization Therapy ICD       | 11,804 (29.7) | 6,652 (32.5)     | 3,582 (27.5)          | 1,570 (25.3)          | < .001  |
| Dual Chamber Pacemaker                      | 17,797 (44.8) | 8,481 (41.4)     | 6,059 (46.6)          | 3,257 (52.4)          | < .001  |
| Cardiac Resynchronization Therapy Pacemaker | 2,359 (5.9)   | 1,067 (5.2)      | 726 (5.6)             | 566 (9.1)             | < .001  |
| <b>Comorbid conditions</b>                  |               |                  |                       |                       |         |
| Dementia                                    | 1,328 (3.3)   | 682 (3.3)        | 424 (3.3)             | 222 (3.6)             | .52     |
| Diabetes Mellitus                           | 15,366 (38.7) | 8,349 (40.7)     | 4,681 (36.0)          | 2,336 (37.6)          | < .001  |
| Ischemic heart disease                      | 28,654 (72.2) | 15,381 (75.1)    | 9,136 (70.2)          | 4,137 (66.6)          | < .001  |
| Peripheral vascular disease                 | 9,132 (23.0)  | 4,946 (24.1)     | 2,824 (21.7)          | 1,362 (21.9)          | < .001  |
| Congestive Heart failure                    | 25,054 (63.1) | 13,538 (66.1)    | 7,750 (59.6)          | 3,766 (60.6)          | < .001  |
| Cerebrovascular disease                     | 7,028 (17.7)  | 3,758 (18.3)     | 2,175 (16.7)          | 1,095 (17.6)          | < .001  |
| Hypertension                                | 35,940 (90.5) | 18,658 (91.1)    | 11,724 (90.1)         | 5,558 (89.4)          | < .001  |
| Chronic obstructive pulmonary disease       | 16,094 (40.5) | 8,361 (40.8)     | 5,174 (39.8)          | 2,559 (41.2)          | .09     |
| Renal disease                               | 13,169 (33.2) | 7,199 (35.1)     | 3,982 (30.6)          | 1,988 (32.0)          | < .001  |
| Stroke/TIA                                  | 3,820 (9.6)   | 1,995 (9.7)      | 1,213 (9.3)           | 612 (9.8)             | .37     |



|                                      | <b>Overall</b> | <b>Percent in AF: 0</b> | <b>Percent in AF: (0, 5]</b> | <b>Percent in AF: (5,98)</b> | <b>p-value</b> |
|--------------------------------------|----------------|-------------------------|------------------------------|------------------------------|----------------|
| Myocardial infarction                | 12,405 (31.2)  | 6,953 (33.9)            | 3,869 (29.8)                 | 1,583 (25.5)                 | < .001         |
| Cancer(metastatic or non-metastatic) | 4,167 (10.5)   | 2,126 (10.4)            | 1,359 (10.4)                 | 682 (11.0)                   | .40            |
| Valvular heart disease               | 16,437 (41.4)  | 8,674 (42.3)            | 5,136 (39.5)                 | 2,627 (42.3)                 | < .001         |
| CHADS2-VASC score, Mean (std)        | 4.9 (1.3)      | 4.9 (1.3)               | 4.8 (1.3)                    | 4.8 (1.4)                    | < .001         |
| Score<=2                             | 1,356 (3.4)    | 608 (3.0)               | 494 (3.8)                    | 254 (4.1)                    | < .001         |
| Score=3                              | 4,122 (10.4)   | 1,959 (9.6)             | 1,455 (11.2)                 | 708 (11.4)                   | < .001         |
| Score>=4                             | 34,232 (86.2)  | 17,923 (87.5)           | 11,056 (85.0)                | 5,253 (84.5)                 | < .001         |
| CHADS2 score, Mean (std)             | 2.7 (1.1)      | 2.8 (1.1)               | 2.7 (1.1)                    | 2.7 (1.1)                    | < .001         |
| Score=0                              | 578 (1.5)      | 254 (1.2)               | 212 (1.6)                    | 112 (1.8)                    | < .001         |
| Score=1                              | 3,949 (9.9)    | 1,906 (9.3)             | 1,390 (10.7)                 | 653 (10.5)                   | < .001         |
| Score>=2                             | 35,183 (88.6)  | 18,330 (89.5)           | 11,403 (87.7)                | 5,450 (87.7)                 | < .001         |

Parentheses indicate exclusive borders, brackets indicate inclusive.

**Table S6. Association between AF burden, by categorical measure, and outcomes among patients with no heart failure at baseline.**

|                               |           | Unadjusted Model<br><b>Hazard Ratio<br/>(95% CI)</b> | <b>P-value</b> | Adjusted Model<br><b>Hazard Ratio<br/>(95% CI)</b> | <b>P-value</b> |
|-------------------------------|-----------|------------------------------------------------------|----------------|----------------------------------------------------|----------------|
| <b>New Onset HF at 1 Year</b> |           |                                                      |                |                                                    |                |
| Percent                       | 0 (ref.)  |                                                      |                |                                                    |                |
| in AF                         | (0, 5]    | 1.122 (0.999, 1.261)                                 | 0.052          | 1.184 (1.054, 1.331)                               | 0.005          |
|                               | (5, 98)   | 1.445 (1.260, 1.657)                                 | <.001          | 1.663 (1.447, 1.910)                               | <.001          |
| Maximum                       | 0 (ref.)  |                                                      |                |                                                    |                |
| Duration per                  | (1, 59]   | 1.198 (1.009, 1.421)                                 | 0.039          | 1.220 (1.028, 1.449)                               | 0.023          |
| min                           | (59,1410) | 1.158 (1.018, 1.318)                                 | 0.026          | 1.317 (1.155, 1.501)                               | <.001          |
|                               | ≥1410     | 1.574 (1.339, 1.851)                                 | <.001          | 1.783 (1.514, 2.099)                               | <.001          |
| <b>Mortality at 1 Year</b>    |           |                                                      |                |                                                    |                |
| Percent                       | 0 (ref.)  |                                                      |                |                                                    |                |
| in AF                         | (0, 5]    | 1.171 (0.982, 1.396)                                 | 0.078          | 1.209 ( 1.013, 1.443)                              | 0.035          |
|                               | (5, 98)   | 1.248 (1.003, 1.552)                                 | 0.047          | 1.405 (1.127, 1.752)                               | 0.003          |
| Maximum                       | 0 (ref.)  |                                                      |                |                                                    |                |
| Duration per                  | (1, 59]   | 1.476 (1.161, 1.876)                                 | 0.002          | 1.544 (1.213, 1.964)                               | <.001          |
| min                           | (59,1410) | 1.133 (0.929, 1.383)                                 | 0.219          | 1.225 (1.002, 1.498)                               | 0.048          |
|                               | ≥1410     | 1.146 (0.868, 1.515)                                 | 0.337          | 1.297 (0.980, 1.717)                               | 0.069          |

AF: atrial fibrillation; HF: heart failure; CI: confidence interval.

**Table S7. Association between AF burden, categorical measure, and outcomes among patients with heart failure at baseline.**

|                                     |           | Unadjusted Model<br><b>Hazard Ratio<br/>(95% CI)</b> | <b>P-value</b> | Adjusted Model<br><b>Hazard Ratio<br/>(95% CI)</b> | <b>P-value</b> |
|-------------------------------------|-----------|------------------------------------------------------|----------------|----------------------------------------------------|----------------|
| <b>HF Hospitalization at 1 Year</b> |           |                                                      |                |                                                    |                |
| Percent                             | 0 (ref.)  |                                                      |                |                                                    |                |
| in AF                               | (0, 5]    | 1.079 (1.028, 1.131)                                 | 0.002          | 1.128 (1.075, 1.138)                               | <.001          |
|                                     | (5, 98)   | 1.307 (1.233, 1.386)                                 | <.001          | 1.376 (1.297, 1.460)                               | <.001          |
| Maximum                             | 0 (ref.)  |                                                      |                |                                                    |                |
| Duration per                        | (1, 59]   | 1.071 (0.997, 1.150)                                 | 0.059          | 1.106 (1.030, 1.187)                               | 0.006          |
| min                                 | (59,1410) | 1.132 (1.064, 1.205)                                 | <.001          | 1.191 (1.118, 1.269)                               | <.001          |
|                                     | ≥1410     | 1.386 (1.296, 1.482)                                 | <.001          | 1.440 (1.346, 1.541)                               | <.001          |
| <b>Mortality at 1 Year</b>          |           |                                                      |                |                                                    |                |
| Percent                             | 0 (ref.)  |                                                      |                |                                                    |                |
| in AF                               | (0, 5]    | 1.093 (1.006, 1.187)                                 | 0.036          | 1.147 (1.055, 1.247)                               | 0.001          |
|                                     | (5, 98)   | 1.402 (1.272, 1.547)                                 | <.001          | 1.444 (1.308, 1.594)                               | <.001          |
| Maximum                             | 0 (ref.)  |                                                      |                |                                                    |                |
| Duration per                        | (1, 59]   | 1.100 (0.973, 1.243)                                 | 0.127          | 1.163 (1.029, 1.314)                               | 0.016          |
| min                                 | (59,1410) | 1.145 (1.028, 1.275)                                 | 0.014          | 1.194 (1.071, 1.330)                               | 0.001          |
|                                     | ≥1410     | 1.449 (1.296, 1.620)                                 | <.001          | 1.458 (1.303, 1.631)                               | <.001          |

AF: atrial fibrillation; HF: heart failure; CI: confidence interval.

**Table S8. Hazard ratios for the association between AF burden and outcomes using time-dependent Cox models with percentage in AF and maximum AF duration as time-varying variables calculated each 30-day period out to 3 years of follow-up. For these models, we additionally censored patients at the end of device data follow-up (last patient device update or 12/31/2017).**

|                                                          |                          |                              | Unadjusted Model             |                      | Adjusted Model        |                      |       |  |
|----------------------------------------------------------|--------------------------|------------------------------|------------------------------|----------------------|-----------------------|----------------------|-------|--|
|                                                          |                          |                              | Hazard Ratio (95% CI)        | P-value              | Hazard Ratio (95% CI) | P-value              |       |  |
| <i>New Onset HF among beneficiaries with no prior HF</i> |                          |                              |                              |                      |                       |                      |       |  |
| 1 Year                                                   | Continuous Variables     | Percent in AF, per 10        | 1.079 (1.079, 1.079)         | <.001                | 1.078 (1.077, 1.078)  | <.001                |       |  |
|                                                          |                          | Maximum Duration, per 30 min | 1.000 (1.000, 1.000)         | <.001                | 1.000 (1.000, 1.000)  | <.001                |       |  |
|                                                          |                          | Maximum Duration, per 1 hour | 1.000 (1.000, 1.001)         | <.001                | 1.000 (1.000, 1.001)  | <.001                |       |  |
|                                                          | Categorical Variables    | Percent in AF                | 0 (ref.)                     |                      |                       |                      |       |  |
|                                                          |                          |                              | (0, 5]                       | 1.033 (1.029, 1.036) | <.001                 | 1.057 (1.054, 1.061) | <.001 |  |
|                                                          |                          |                              | (5, 98)                      | 1.325 (1.320, 1.331) | <.001                 | 1.451 (1.444, 1.457) | <.001 |  |
|                                                          |                          | Maximum Duration per min     | [98, 100)                    | 2.040 (2.030, 2.050) | <.001                 | 2.013 (2.003, 2.023) | <.001 |  |
|                                                          |                          |                              | 0 min (ref.)                 |                      |                       |                      |       |  |
|                                                          |                          |                              | 1 - 59 min                   | 1.053 (1.051, 1.056) | <.001                 | 1.057 (1.053, 1.060) | <.001 |  |
|                                                          | Continuous Variables     | Percent in AF, per 10        | 1 - 23 hours                 | 1.050 (1.047, 1.054) | <.001                 | 1.063 (1.060, 1.067) | <.001 |  |
|                                                          |                          |                              | Maximum Duration, per 30 min | 1.056 (1.056, 1.057) | <.001                 | 1.056 (1.056, 1.056) | <.001 |  |
|                                                          |                          |                              | Maximum Duration, per 1 hour | 1.000 (1.000, 1.000) | <.001                 | 1.000 (1.000, 1.000) | <.001 |  |
| 3 Years                                                  | Categorical Variables    | >= 24 hours                  | 1.000 (1.000, 1.001)         | <.001                | 1.000 (1.000, 1.001)  | <.001                |       |  |
|                                                          |                          | Percent in AF                | 0 (ref.)                     |                      |                       |                      |       |  |
|                                                          |                          |                              | (0, 5]                       | 1.015 (1.013, 1.017) | <.001                 | 1.030 (1.027, 1.032) | <.001 |  |
|                                                          | (5, 98)                  |                              | 1.241 (1.237, 1.245)         | <.001                | 1.351 (1.347, 1.355)  | <.001                |       |  |
|                                                          | Maximum Duration per min | [98, 100)                    | 1.631 (1.625, 1.637)         | <.001                | 1.612 (1.606, 1.618)  | <.001                |       |  |
|                                                          |                          | 0 min (ref.)                 |                              |                      |                       |                      |       |  |
| 1 - 59 min                                               |                          | 1.052 (1.050, 1.054)         | <.001                        | 1.057 (1.055, 1.060) | <.001                 |                      |       |  |
| Mortality among beneficiaries with no prior HF           | 1 Year                   | 1 - 23 hours                 | 1.050 (1.047, 1.053)         | <.001                | 1.061 (1.059, 1.064)  | <.001                |       |  |
|                                                          |                          | >= 24 hours                  | 1.103 (1.101, 1.105)         | <.001                | 1.139 (1.137, 1.141)  | <.001                |       |  |
|                                                          |                          | Percent in AF, per 10        | 1.034 (1.032, 1.036)         | <.001                | 1.039 (1.037, 1.041)  | <.001                |       |  |

|                                                       |                       |                              | Unadjusted Model             |                      | Adjusted Model        |                      |       |
|-------------------------------------------------------|-----------------------|------------------------------|------------------------------|----------------------|-----------------------|----------------------|-------|
|                                                       |                       |                              | Hazard Ratio (95% CI)        | P-value              | Hazard Ratio (95% CI) | P-value              |       |
|                                                       | Continuous Variables  | Maximum Duration, per 30 min | 1.000 (1.000, 1.000)         | <.001                | 1.000 (1.000, 1.000)  | <.001                |       |
|                                                       |                       | Maximum Duration, per 1 hour | 1.000 (1.000, 1.001)         | <.001                | 1.000 (1.000, 1.001)  | <.001                |       |
|                                                       | Categorical Variables | 0 (ref.)                     |                              |                      |                       |                      |       |
|                                                       |                       | Percent in AF                | (0, 5]                       | 1.126 (1.114, 1.138) | <.001                 | 1.158 (1.146, 1.171) | <.001 |
|                                                       |                       |                              | (5, 98)                      | 1.286 (1.268, 1.303) | <.001                 | 1.439 (1.420, 1.459) | <.001 |
|                                                       |                       |                              | [98, 100)                    | 1.449 (1.411, 1.488) | <.001                 | 1.426 (1.389, 1.464) | <.001 |
|                                                       |                       | Maximum Duration per min     | 0 min (ref.)                 |                      |                       |                      |       |
|                                                       |                       |                              | 1 - 59 min                   | 1.230 (1.213, 1.247) | <.001                 | 1.262 (1.245, 1.279) | <.001 |
|                                                       |                       |                              | 1 - 23 hours                 | 1.024 (1.012, 1.036) | <.001                 | 1.108 (1.096, 1.121) | <.001 |
|                                                       |                       |                              | >= 24 hours                  | 1.394 (1.375, 1.413) | <.001                 | 1.528 (1.508, 1.549) | <.001 |
|                                                       |                       | Percent in AF, per 10        | 1.048 (1.047, 1.048)         | <.001                | 1.046 (1.045, 1.047)  | <.001                |       |
|                                                       |                       | Continuous Variables         | Maximum Duration, per 30 min | 1.000 (1.000, 1.000) | <.001                 | 1.000 (1.000, 1.000) | <.001 |
| Maximum Duration, per 1 hour                          | 1.000 (1.000, 1.001)  |                              | <.001                        | 1.000 (1.000, 1.001) | <.001                 |                      |       |
| 0 (ref.)                                              |                       |                              |                              |                      |                       |                      |       |
| 3 Years                                               | Categorical Variables | Percent in AF                | (0, 5]                       | 0.995 (0.990, 0.999) | 0.016                 | 1.016 (1.011, 1.020) | <.001 |
|                                                       |                       |                              | (5, 98)                      | 1.145 (1.138, 1.152) | <.001                 | 1.282 (1.275, 1.290) | <.001 |
|                                                       |                       |                              | [98, 100)                    | 1.555 (1.543, 1.567) | <.001                 | 1.477 (1.466, 1.489) | <.001 |
|                                                       |                       | Maximum Duration per min     | 0 min (ref.)                 |                      |                       |                      |       |
| 1 - 59 min                                            | 1.138 (1.131, 1.144)  |                              | <.001                        | 1.143 (1.136, 1.149) | <.001                 |                      |       |
| 1 - 23 hours                                          | 0.935 (0.931, 0.940)  |                              | <.001                        | 1.035 (1.030, 1.040) | <.001                 |                      |       |
|                                                       |                       | >= 24 hours                  | 1.219 (1.212, 1.225)         | <.001                | 1.288 (1.281, 1.295)  | <.001                |       |
| <i>Mortality among beneficiaries with baseline HF</i> |                       |                              |                              |                      |                       |                      |       |
|                                                       | Continuous Variables  | Percent in AF, per 10        | 1.062 (1.061, 1.062)         | <.001                | 1.060 (1.060, 1.061)  | <.001                |       |
|                                                       |                       | Maximum Duration, per 30 min | 1.000 (1.000, 1.000)         | <.001                | 1.000 (1.000, 1.000)  | <.001                |       |
|                                                       |                       | Maximum Duration, per 1 hour | 1.000 (1.000, 1.001)         | <.001                | 1.000 (1.000, 1.001)  | <.001                |       |
| 1 Year                                                | Categorical Variables | 0 (ref.)                     |                              |                      |                       |                      |       |
|                                                       |                       | Percent in AF                | (0, 5]                       | 1.131 (1.125, 1.137) | <.001                 | 1.174 (1.167, 1.180) | <.001 |
|                                                       |                       |                              | (5, 98)                      | 1.431 (1.421, 1.850) | <.001                 | 1.469 (1.459, 1.479) | <.001 |
|                                                       |                       |                              | [98, 100]                    | 1.869 (1.850, 1.890) | <.001                 | 1.782 (1.763, 1.802) | <.001 |
|                                                       |                       | Maximum Duration per min     | 0 min (ref.)                 |                      |                       |                      |       |
|                                                       |                       |                              | 1 - 59 min                   | 1.174 (1.167, 1.181) | <.001                 | 1.208 (1.200, 1.215) | <.001 |
| 1 - 23 hours                                          | 1.218 (1.210, 1.226)  |                              | <.001                        | 1.241 (1.232, 1.249) | <.001                 |                      |       |
|                                                       |                       | >= 24 hours                  | 1.488 (1.478, 1.497)         | <.001                | 1.453 (1.444, 1.462)  | <.001                |       |
| 3 Years                                               |                       | Percent in AF, per 10        | 1.031 (1.031, 1.031)         | <.001                | 1.028 (1.028, 1.028)  | <.001                |       |

|                                                                |                       |                              | Unadjusted Model      |                      | Adjusted Model        |                      |       |
|----------------------------------------------------------------|-----------------------|------------------------------|-----------------------|----------------------|-----------------------|----------------------|-------|
|                                                                |                       |                              | Hazard Ratio (95% CI) | P-value              | Hazard Ratio (95% CI) | P-value              |       |
|                                                                | Continuous Variables  | Maximum Duration, per 30 min | 1.000 (1.000, 1.000)  | <.001                | 1.000 (1.000, 1.000)  | <.001                |       |
|                                                                |                       | Maximum Duration, per 1 hour | 1.000 (1.000, 1.001)  | <.001                | 1.000 (1.000, 1.001)  | <.001                |       |
|                                                                | Categorical Variables | 0 (ref.)                     |                       |                      |                       |                      |       |
|                                                                |                       | Percent in AF                | (0, 5]                | 1.001 (0.999, 1.003) | <.001                 | 1.039 (1.037, 1.042) | <.001 |
|                                                                |                       |                              | (5, 98)               | 1.157 (1.153, 1.161) | <.001                 | 1.226 (1.222, 1.230) | <.001 |
|                                                                |                       |                              | [98,100]              | 1.325 (1.320, 1.330) | <.001                 | 1.279 (1.273, 1.284) | <.001 |
|                                                                |                       | Maximum Duration per min     | 0 min (ref.)          |                      |                       |                      |       |
|                                                                |                       |                              | 1 - 59 min            | 1.019 (1.016, 1.022) | <.001                 | 1.093 (1.090, 1.096) | <.001 |
| <i>HF hospitalization among beneficiaries with baseline HF</i> | Continuous Variables  | 1 - 23 hours                 | 1.090 (1.087, 1.093)  | <.001                | 1.103 (1.100, 1.106)  | <.001                |       |
|                                                                |                       | >= 24 hours                  | 1.198 (1.195, 1.202)  | <.001                | 1.203 (1.199, 1.206)  | <.001                |       |
|                                                                |                       | Percent in AF, per 10        | 1.028 (1.028, 1.028)  | <.001                | 1.028 (1.028, 1.028)  | <.001                |       |
| 1 Year                                                         | Continuous Variables  | Maximum Duration, per 30 min | 1.000 (1.000, 1.000)  | <.001                | 1.000 (1.000, 1.000)  | <.001                |       |
|                                                                |                       | Maximum Duration, per 1 hour | 1.000 (1.000, 1.001)  | <.001                | 1.000 (1.000, 1.001)  | <.001                |       |
|                                                                |                       | 0 (ref.)                     |                       |                      |                       |                      |       |
|                                                                | Categorical Variables | Percent in AF                | (0, 5]                | 1.028 (1.027, 1.030) | <.001                 | 1.052 (1.051, 1.054) | <.001 |
|                                                                |                       |                              | (5, 98)               | 1.152 (1.150, 1.155) | <.001                 | 1.188 (1.188, 1.191) | <.001 |
|                                                                |                       |                              | [98,100]              | 1.308 (1.305, 1.310) | <.001                 | 1.309 (1.306, 1.312) | <.001 |
|                                                                | Continuous Variables  | Maximum Duration per min     | 0 min (ref.)          |                      |                       |                      |       |
|                                                                |                       |                              | 1 - 59 min            | 1.001 (0.995, 1.005) | <.001                 | 1.008 (1.006, 1.010) | <.001 |
|                                                                |                       |                              | 1 - 23 hours          | 1.050 (1.047, 1.054) | <.001                 | 1.063 (1.060, 1.067) | <.001 |
|                                                                |                       |                              | >= 24 hours           | 1.151 (1.149, 1.154) | <.001                 | 1.182 (1.179, 1.184) | <.001 |
|                                                                |                       | Percent in AF, per 10        | 1.024 (1.024, 1.024)  | <.001                | 1.024 (1.024, 1.024)  | <.001                |       |
|                                                                |                       | Maximum Duration, per 30 min | 1.000 (1.000, 1.000)  | <.001                | 1.000 (1.000, 1.000)  | <.001                |       |
| 3 Years                                                        | Continuous Variables  | Maximum Duration, per 1 hour | 1.000 (1.000, 1.001)  | <.001                | 1.000 (1.000, 1.001)  | <.001                |       |
|                                                                |                       | 0 (ref.)                     |                       |                      |                       |                      |       |
|                                                                |                       | Percent in AF                | (0, 5]                | 1.041 (1.040, 1.042) | <.001                 | 1.061 (1.060, 1.062) | <.001 |
|                                                                | Categorical Variables |                              | (5, 98)               | 1.135 (1.133, 1.137) | <.001                 | 1.180 (1.178, 1.182) | <.001 |
|                                                                |                       |                              | [98, 100]             | 1.272 (1.270, 1.274) | <.001                 | 1.268 (1.266, 1.270) | <.001 |
|                                                                |                       | Maximum Duration per min     | 0 min (ref.)          |                      |                       |                      |       |
|                                                                |                       | 1 - 59 min                   | 1.003 (1.000, 1.005)  | <.001                | 1.011 (1.009, 1.014)  | <.001                |       |
|                                                                |                       | 1 - 23 hours                 | 1.056 (1.053, 1.058)  | <.001                | 1.061 (1.059, 1.064)  | <.001                |       |
|                                                                |                       | >= 24 hours                  | 1.103 (1.101, 1.105)  | <.001                | 1.139 (1.137, 1.141)  | <.001                |       |

**Figure S2. Hazard ratios based on restricted cubic splines analyses of maximum AF episode duration for endpoints that appeared to show non-linearity: (A) new-onset HF among patients without HF at baseline, and (B) HF hospitalization and (C) all-cause mortality among patients with HF at baseline.**

A.

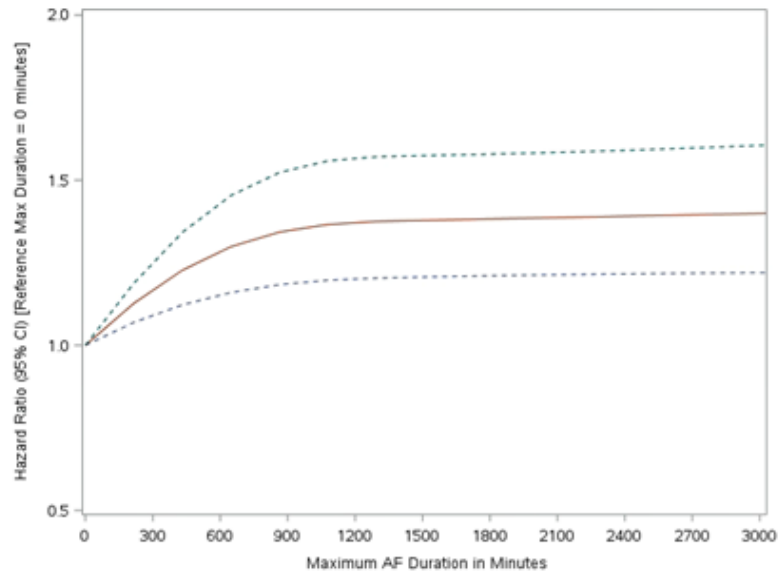

B.

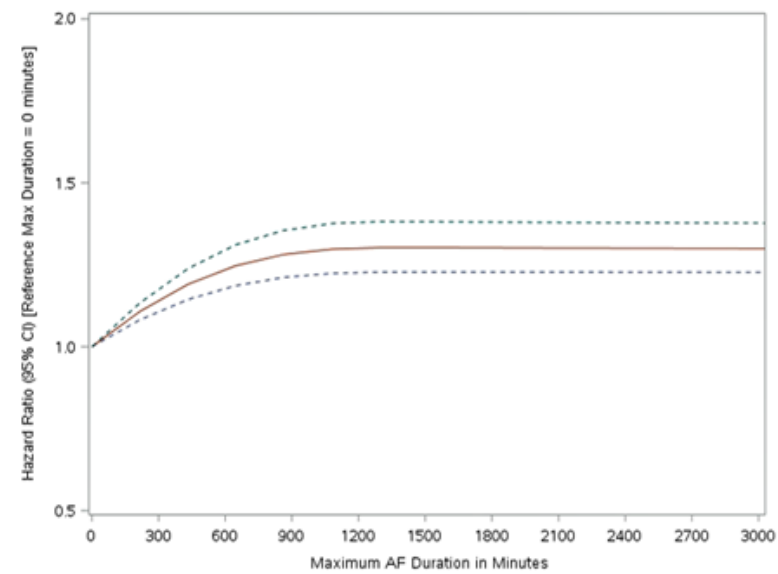

C.

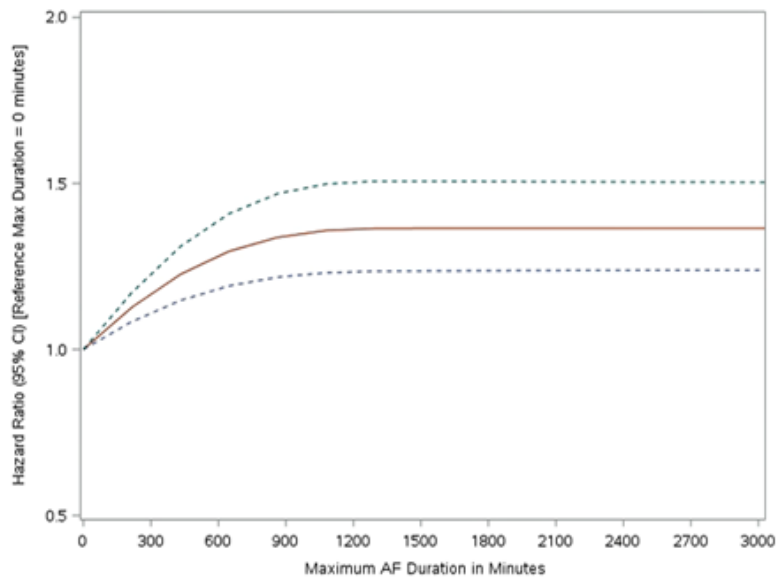

1. Hammill BG, Hernandez AF, Peterson ED, et al. Linking inpatient clinical registry data to Medicare claims data using indirect identifiers. *Am Heart J* 2009;157:995-1000.
